# Supplementary material for: Co–Mo–P carbon nanospheres derived from metal–organic frameworks as a high-performance electrocatalyst towards efficient water splitting
Source: Royal Society of Chemistry journal article supplement (doi:10.1039/d0ta10426d), 2020-12-10
Supplement: d0ta10426d1.pdf [file d0ta10426d1.pdf]

## Electronic Supplementary Information

### Co-Mo-P carbon nanosphere derived from metal-organic frameworks as high-performance catalyst towards efficient water splitting

Nan Li<sup>#</sup>, Yi Guan<sup>#</sup>, Yongliang Li<sup>\*</sup>, Hongwei Mi, Libo Deng, Lingna Sun, Qianling Zhang,

Chuanxin He, Xiangzhong Ren<sup>\*</sup>

College of Chemistry and Environmental Engineering, Shenzhen University, Shenzhen,

Guangdong 518060, P.R. China

Corresponding author:

Xiangzhong Ren, Email: renxz@szu.edu.cn, Tel/Fax: +86-755-26558134

Yongliang Li, Email: liyli@szu.edu.cn, Tel/Fax: +86-755-26536627

<sup>#</sup> These authors contributed equally to this work and should be considered co-first authors.

#### Chemicals

Molybdenum trioxide ( $\text{MoO}_3$ ;  $\geq 99.0\%$ ), Imidazole ( $\text{C}_3\text{H}_4\text{N}_2$ ;  $\geq 99.0\%$ ), Zinc acetate ( $\text{Zn}(\text{Ac})_2$ ;  $\geq 99.0\%$ ), Cobalt acetate ( $\text{Co}(\text{Ac})_2$ ;  $\geq 99.0\%$ ), 2-methylimidazole (2-mIm;  $98.0\%$ ), Ammonium hydroxide ( $\text{NH}_3 \cdot \text{H}_2\text{O}$ , 25-28wt.%), ethanol (EtOH, absolute), All the chemicals were purchased from Aladdin Industrial Corporation. and used as received without further purification.

#### Synthesis of Mo-MOF

Mo-MOF was modified according to the preparation process previously reported [28]. Firstly, 0.068 g of imidazole and 0.144 g of  $\text{MoO}_3$  were mixed in 100 mL specific solvent (the composition of the solution is methanol and water in a volume ratio of 3:2). Then after stirred for 12 hours, the product has been centrifuged three times at 10000 rpm to obtain a precipitate. Finally, the products have been dispersed in 30 mL of ammonia (AR, 25%-28%),

### **Synthesis of Co/Co<sub>3</sub>O<sub>4</sub>/Mo-MOF**

In a typical procedure, 8 mL of 0.2 mol L<sup>-1</sup> cobalt nitrate solution was gradually added dropwise to Mo-MOF ammonia aqueous solution, and stirred vigorously for 30 minutes. Then above solution was packed in a 100 mL Teflon autoclave, then put it at 180 °C for 4 hours. Then, resulting products was collected by centrifugation at 10000 rpm for 5 min and washed with ultrapure water until the pH is approximately equal to 7, and then place it in a 60°C vacuum oven to dry overnight.

### **Synthesis of Co/Co<sub>3</sub>O<sub>4</sub>/MoO<sub>3</sub>@NCNS products**

The as-prepared Co/Co<sub>3</sub>O<sub>4</sub>/Mo-MOF was pyrolyzed at 400 °C with 10 °C min<sup>-1</sup> rate in an Nitrogen atmosphere for 3 h, and then heated to 500/600/700 °C with the same heating rate, and kept for 4 h. The final product is Co/Co<sub>3</sub>O<sub>4</sub>/MoO<sub>3</sub>@NCNS-500/600/700, respectively.

### **Synthesis of Co-Mo-P@NCNS products**

Typically, 50 mg of Co/Co<sub>3</sub>O<sub>4</sub>/MoO<sub>3</sub>@NCNS powders and 1 g of sodium hypophosphite are placed in the same quartz boat, and the latter is placed upstream side. Through the 300 °C pyrolysis process with a rate of 2 °C min<sup>-1</sup> in Nitrogen atmosphere for 2 h, we can obtain phosphating products. The obtained phosphating product was then washed in 2M HCl for 3 h to eliminate accessible cobalt species on surface, then washed it with ethanol and deionized water several times and dry overnight in vacuum oven yielding the final product Co-Mo-P@NCNS-500/600/700.

### **Preparation of the Working Electrode**

The electrocatalyst ink was prepared by dispersing 5 mg of samples in a mixture of 1.5 mL of ethanol and 40  $\mu\text{L}$  of dilute aqueous Nafion solution (5 wt%). The working electrode was obtained by ultrasonically dispersing and dropping 15  $\mu\text{L}$  of catalyst ink on a glassy carbon RRDE (with a disk diameter of 4 mm,  $A_{\text{disk}} = 0.126 \text{ cm}^2$ ; inner/outer-ring diameter: 5.0/7.0 mm,  $A_{\text{ring}} = 0.188 \text{ cm}^2$ ) from BAS Inc. The electrocatalyst loading was  $0.398 \text{ mg cm}^{-2}$  based on the geometric electrode area of  $0.126 \text{ cm}^2$ .

### **Materials characterization**

The crystallite structure was investigated by X-ray diffraction (XRD) on a PANalytical/Empyrean diffractometer with  $\text{CuK}\alpha$  radiation. The morphology and microstructure were inspected using a field emission scanning electron microscope (FESEM, JEOL JSM-7800F) and transmission electron microscopy (TEM, JEOL-F200), respectively. X-ray photoelectron spectroscopy (XPS) measurements were performed on a K-Alpha+ spectrometer using a monochromic Al X-ray source. Raman spectra were obtained using a Renishaw/Invia Reflex spectrometer coupled with a 633 nm laser. Nitrogen adsorption-desorption isotherms were measured using a BELSORP-max instrument. The specific surface area and pore size distribution were determined using the Brunauer-Emmett-Teller (BET) theory and the nonlocal density functional theory (NLDFT) method, respectively.

### **Electrochemical tests**

All the measurements were carried out on a CHI760E electrochemical workstation (CHInstruments, Inc., Shanghai) with a MSR electrode rotator (BAS RRDE-3A,

Japan). The three-electrode cell was used to perform the electrochemical measurements, with an Ag/AgCl (3M KCl) and graphite rod serving as the reference electrode and counter electrode, respectively. The HER and OER performance was evaluated in N<sub>2</sub>-saturated 1 M KOH solutions. The potential was converted to a potential versus reversible hydrogen electrode (RHE) according to  $E_{(vs.RHE)} = E_{(vs. Ag/AgCl)} + 0.222 + 0.059pH$ . The OER/HER polarization curves were measured at 25°C with a scan rate of 5 mV s<sup>-1</sup>, and the rotation speed is controlled at 1600 rpm. The i-t chronoamperometric response was used to evaluate the long-term durability, which was conducted at a rotation rate of 1600 rpm for 85000s.

### Computational Method

All the density functional theory (DFT) calculations were performed by Vienna Ab-initio Simulation Package[1, 2] (VASP), employing the Projected Augmented Wave[3] (PAW) method. The revised Perdew-Burke-Ernzerhof (RPBE) functional was used to describe the exchange and correlation effects.[4-6]. For all the geometry optimizations, the cutoff energy was set to be 450 eV. A 3×3×1 Monkhorst-Pack grids[7] was used to carry out the surface calculations on MoP and MoP@Co. The MoP@Co structure was modelled as one Co<sub>4</sub> cluster on the (101) surface of MoP. At least 20 Å vacuum layer was applied in z-direction of the slab models, preventing the vertical interactions between slabs.

In alkaline conditions, OER could occur in the following four elementary steps:

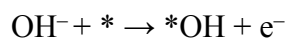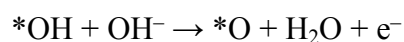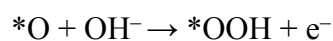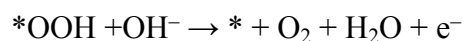

where \* denotes the active sites on the catalyst surface. Based on the above mechanism, the free energy of three intermediate states, \*OH, \*O, and \*OOH, are important to identify a given material's OER and ORR activity. Meanwhile, HER in alkaline condition occurs via the following elementary steps:

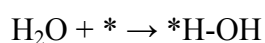

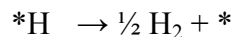

In this mechanism, water dissociated into an adsorbed H-OH state at the catalyst surface, making  $*H-OH$  the first reaction intermediate. Thereafter, the adsorbed OH dissolved into the solution, and the adsorbed H combine with an electron and proton pair to form the gaseous hydrogen molecule.

The computational hydrogen electrode (CHE) model[8] was used to calculate the free energies of OER and HER, based on which the free energy of an adsorbed species is defined as

$$\Delta G_{ads} = \Delta E_{ads} + \Delta E_{ZPE} - T\Delta S_{ads}$$

where  $\Delta E_{ads}$  is the electronic adsorption energy,  $\Delta E_{ZPE}$  is the zero point energy difference between adsorbed and gaseous species, and  $T\Delta S_{ads}$  is the corresponding entropy difference between these two states. The electronic binding energy is referenced as  $\frac{1}{2} H_2$  for each H atom, and  $(H_2O - H_2)$  for each O atom, plus the energy of the clean slab. The corrections of zero-point energy and entropy of the OER and HER intermediates can be found in the supporting information.

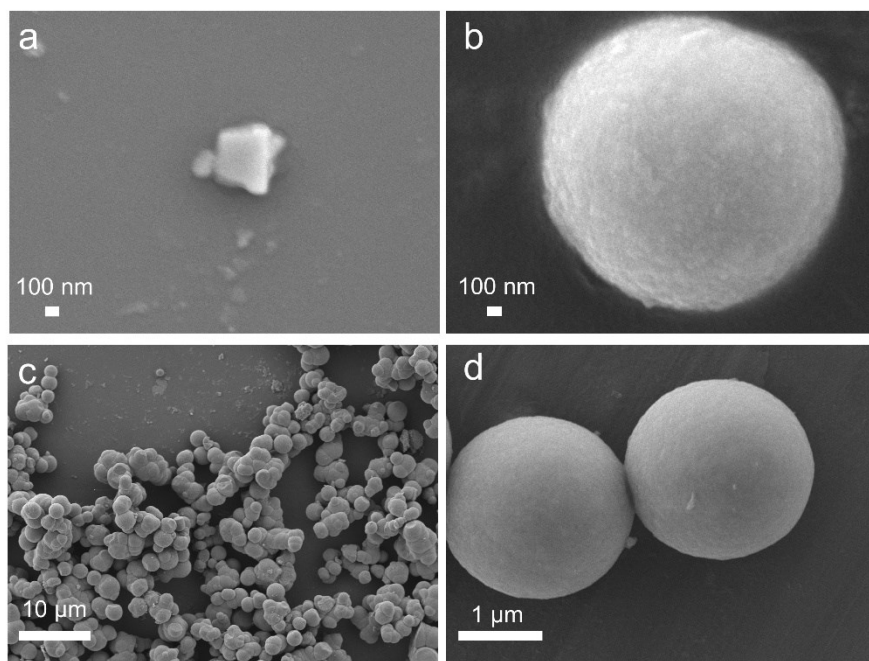

**Figure S1.** SEM images of (a) customized Mo-MOFs and (b) Co/Co<sub>3</sub>O<sub>4</sub>/Mo-MOF; (c) and (d) Co-Mo-P@NCNS-600.

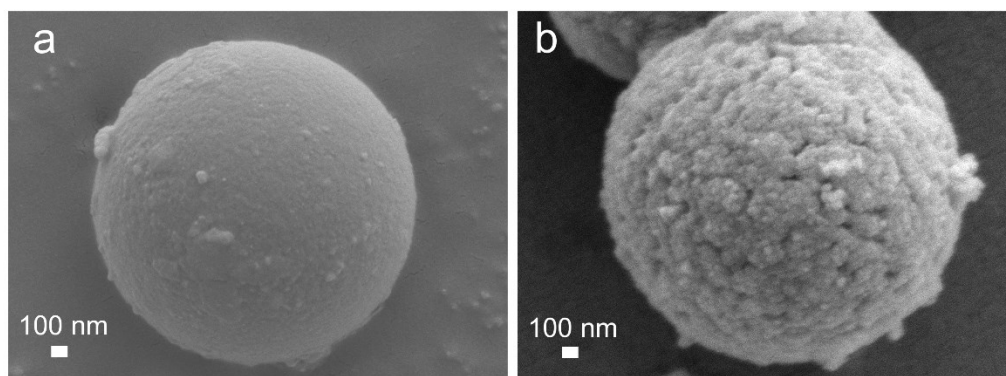

**Figure S2.** SEM images of (a) Co-Mo-P@NCNS-500 and (b) Co-Mo-P@NCNS-700.

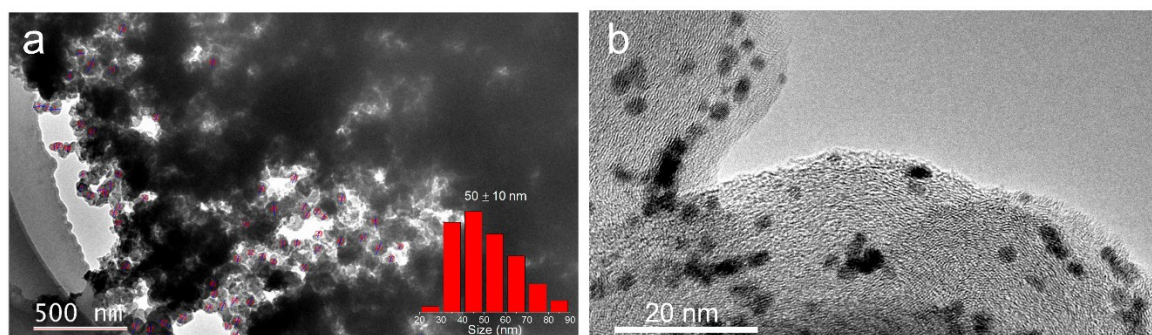

**Figure S3.** (a, b) HRTEM images of Co-Mo-P@NCNS-600.

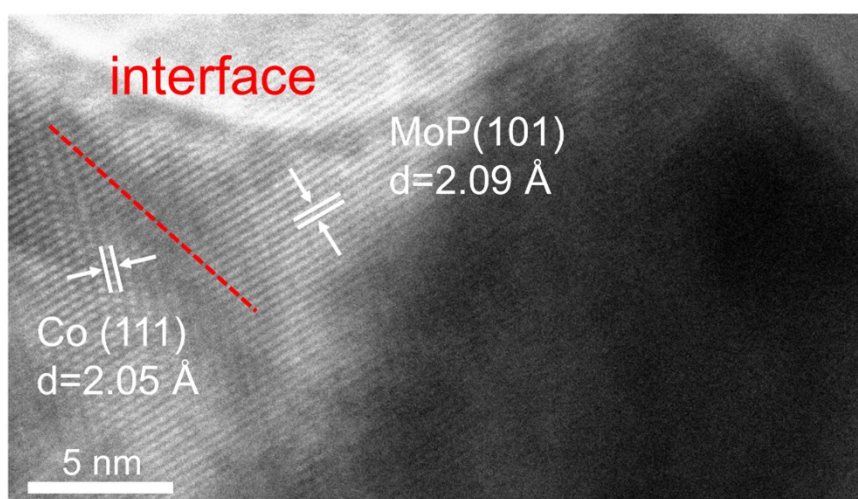

**Figure S4.** HRTEM of Co-Mo-P@NCNS-600, which demonstrate the obvious interface between Co(111) fact and MoP(101).



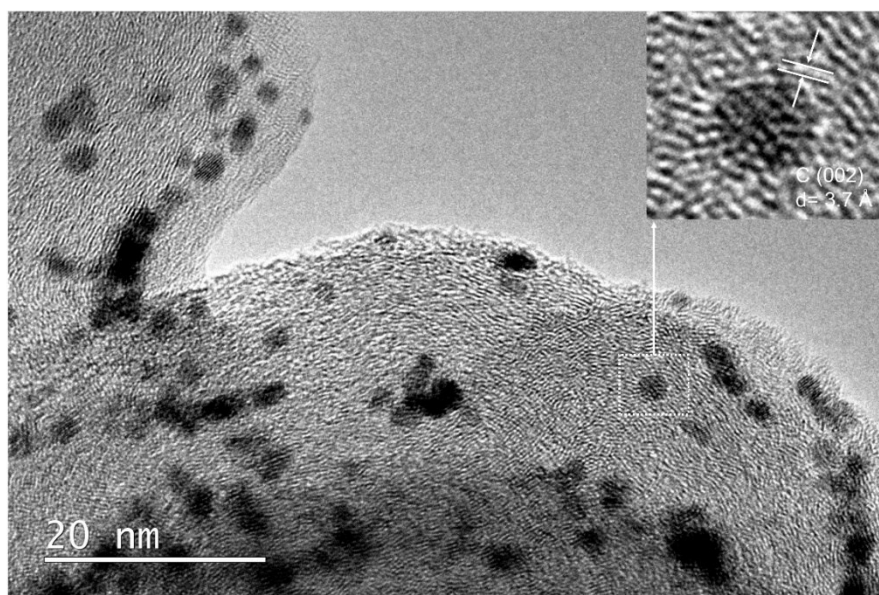

**Figure S5.** The HRTEM image of Co-Mo-P @NCNS-600.

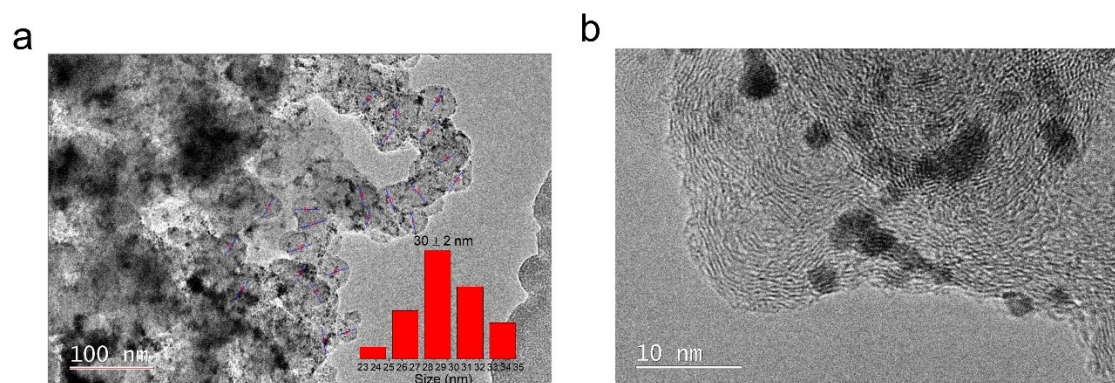

**Figure S6.** The HRTEM image of Co-Mo-P @NCNS-500.

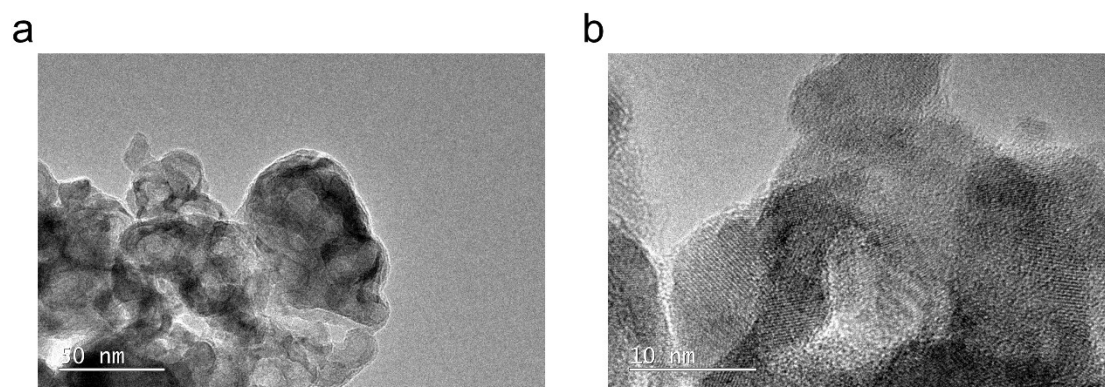

**Figure S7.** The HRTEM image of Co-Mo-P @NCNS-700.

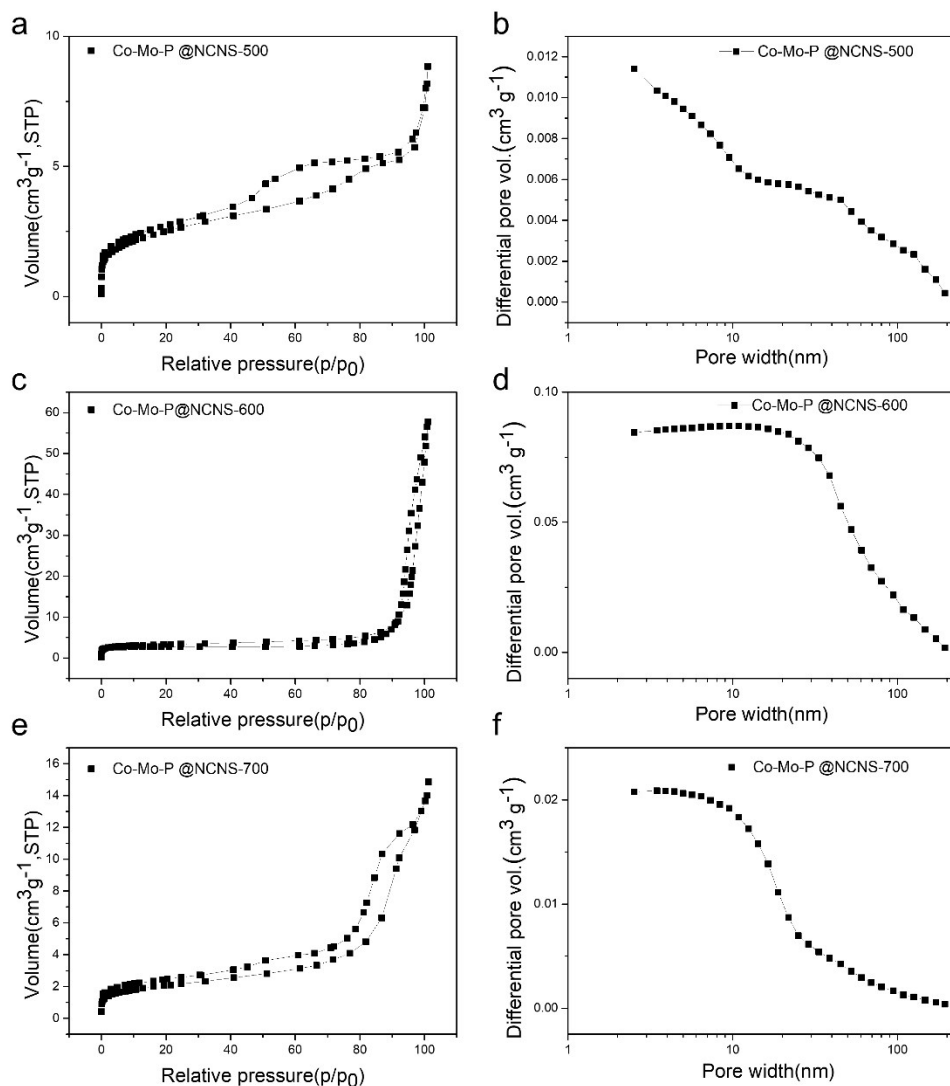

**Figure S8.** Specific surface area and pore size for (a, b) Co-Mo-P @NCNS-500 and (c, d) Co-Mo-P @NCNS-600 and (e, f) Co-Mo-P @NCNS-700.



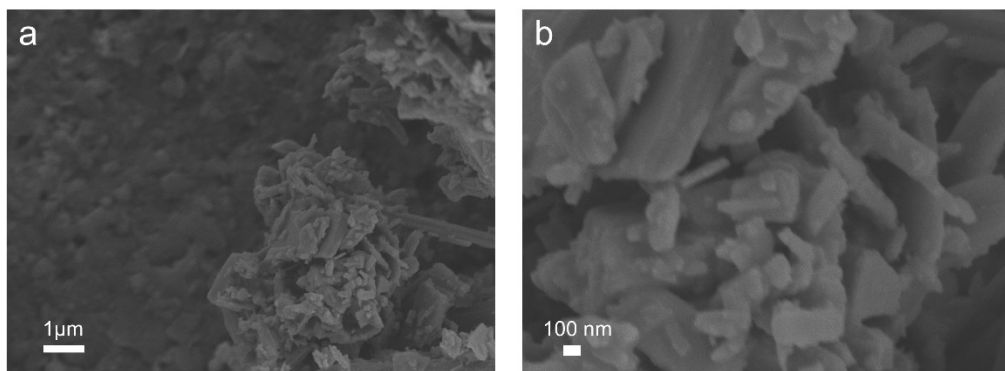

**Figure S9.** SEM images of MoP@NCNS-600.

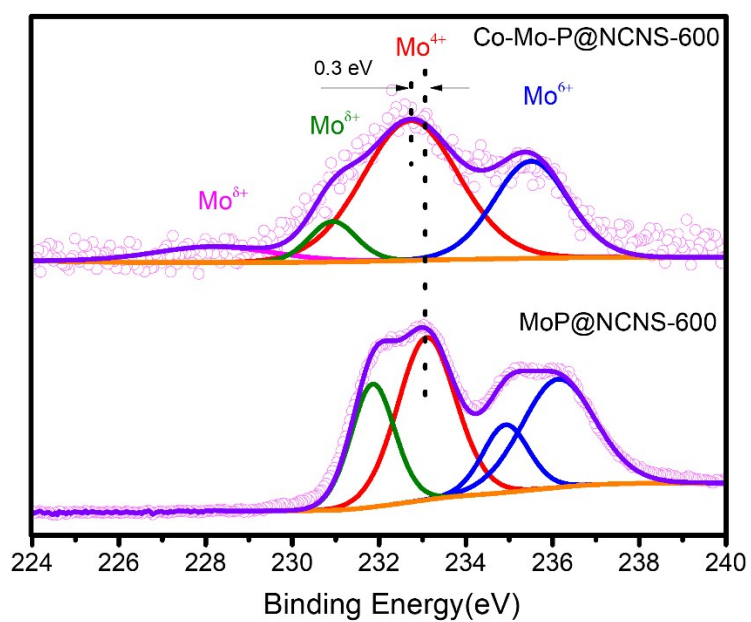

**Figure S10.** Mo 3d XPS spectra of Co-Mo-P@NCNS-600 and MoP@NCNS-600.

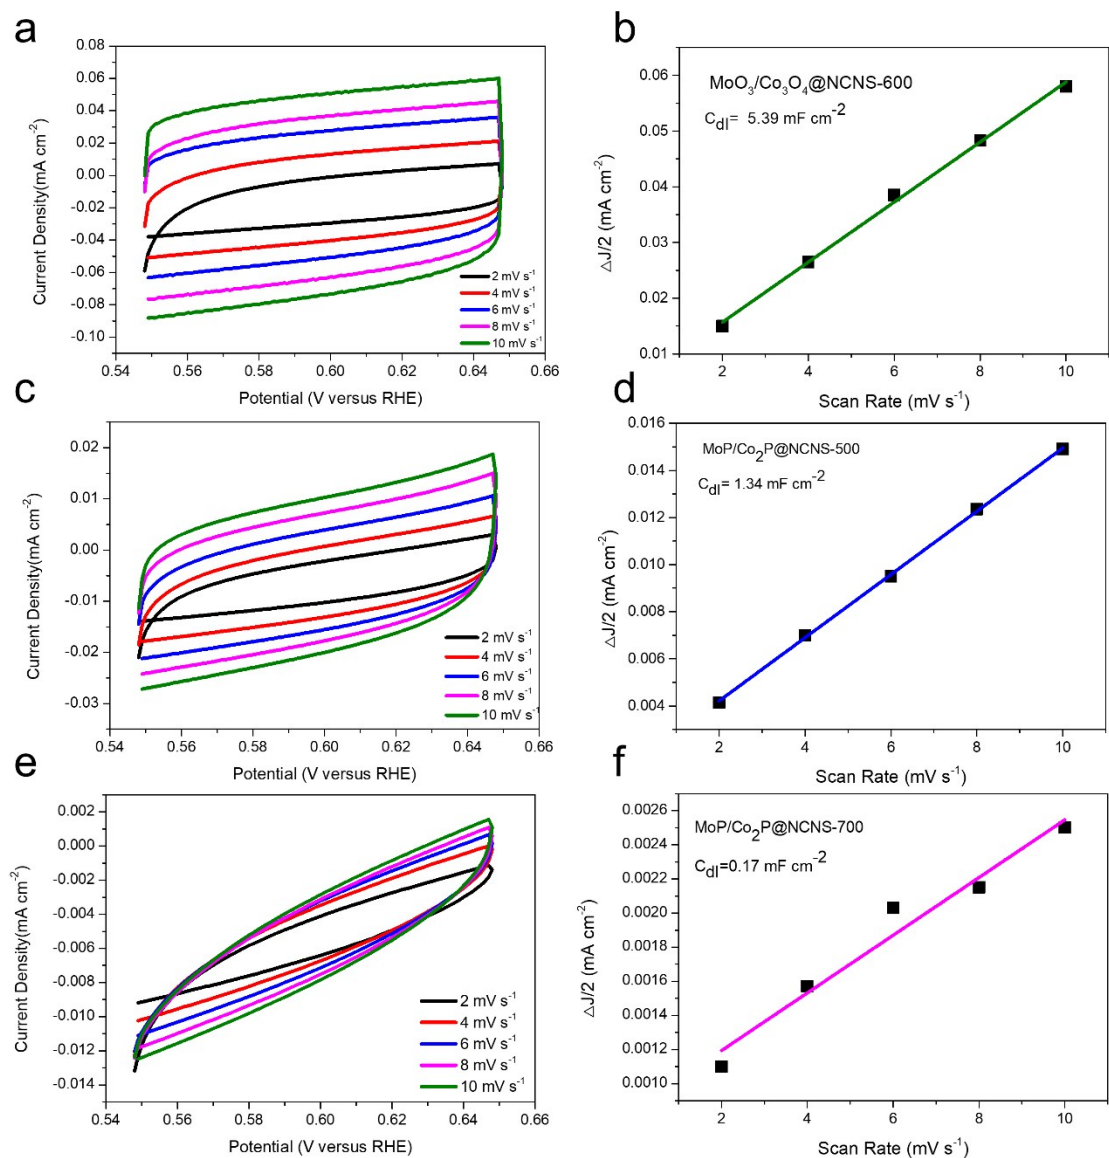

**Figure S11.** Cyclic voltammograms in the region of 0.548-0.648 V vs. RHE at various scan rates and the corresponding linear fitting of the capacitive currents vs. scan rates to estimate the  $C_{dl}$ . (a, b) for Co/Co<sub>3</sub>O<sub>4</sub>/MoO<sub>3</sub>@NCNS-600@NCNS-600; (c, d) for Co-Mo-P@NCNS-500 and (e, f) Co-Mo-P@NCNS-700.

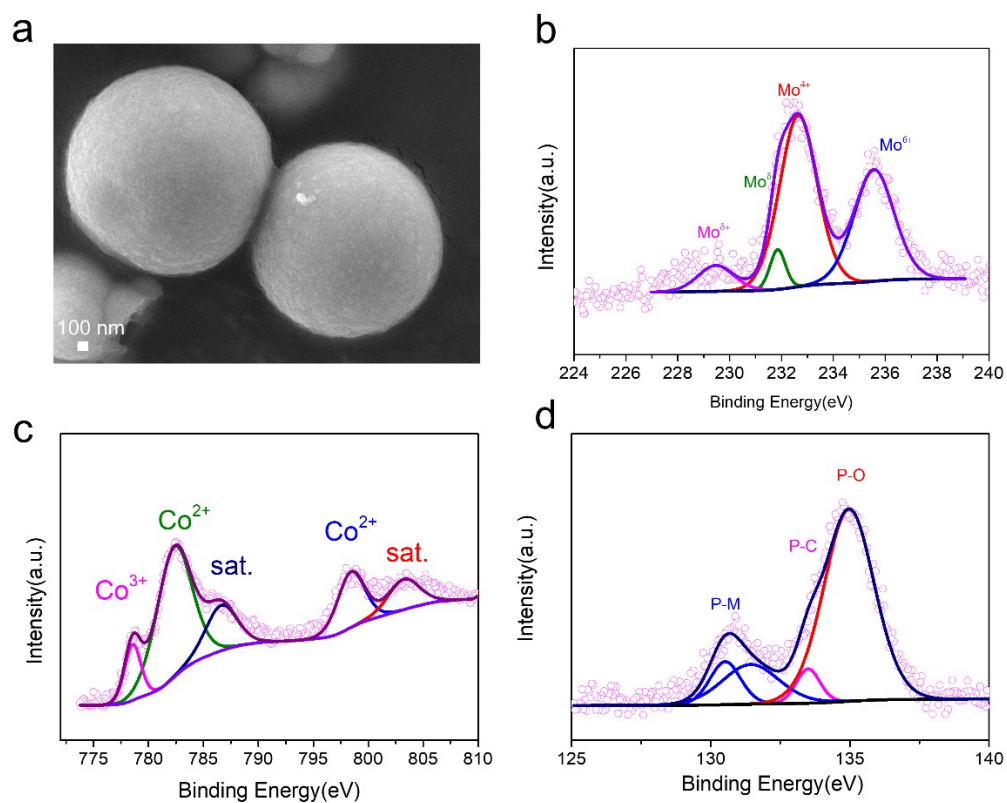

**Figure S12.** (a) SEM image and (b,c,d) XPS spectra of Co-Mo-P@NCNS-600 after HER test.

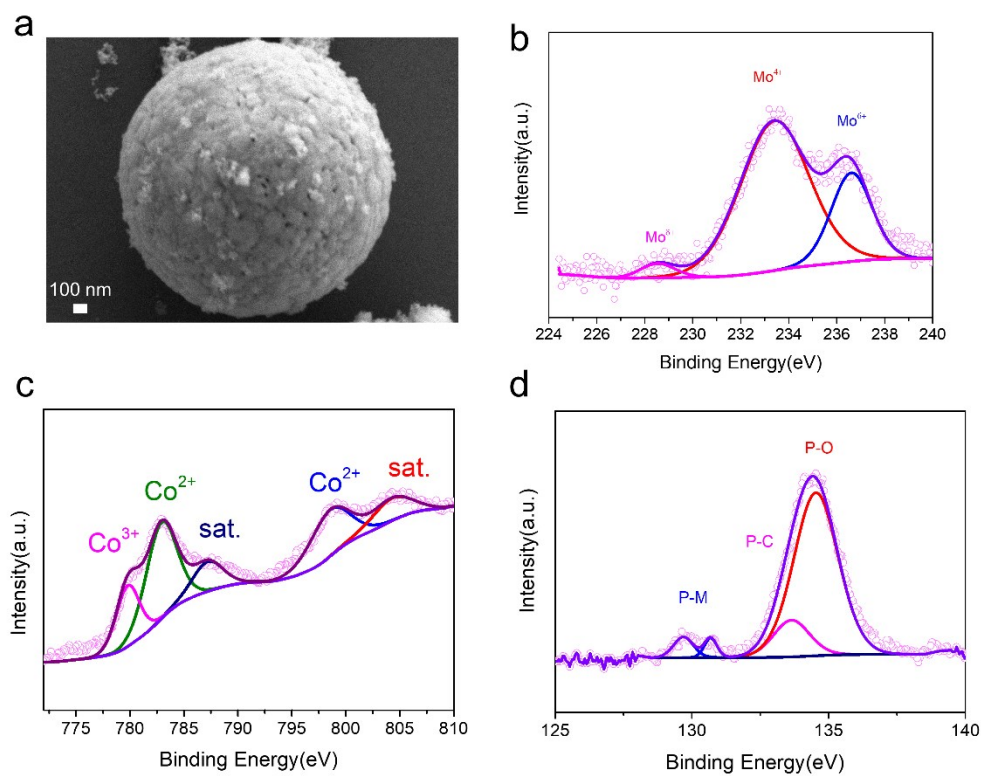

**Figure S13.** (a) SEM image and (b,c,d) XPS spectra of Co-Mo-P@NCNS-600 after OER test.

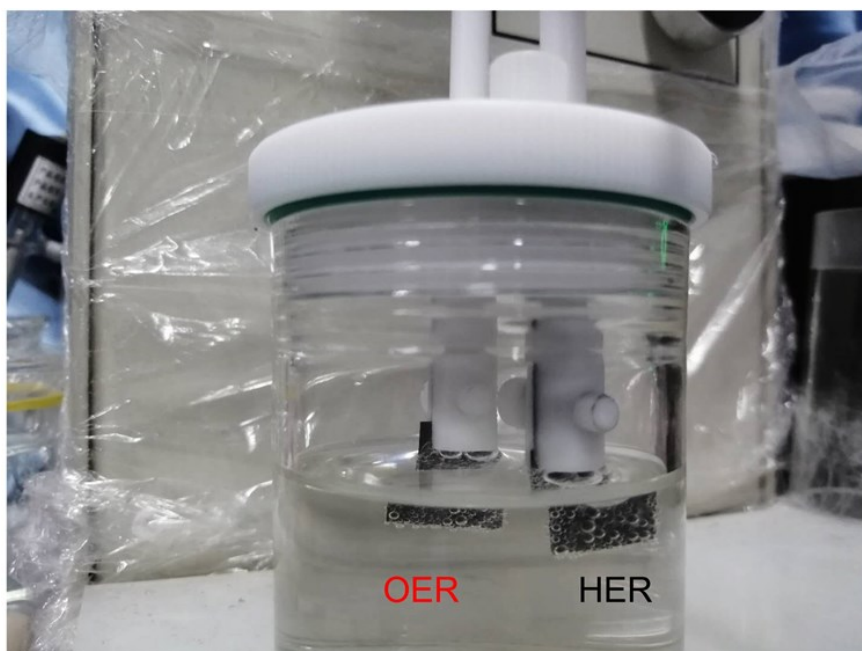

**Figure S14.** Optical photographs of overall water splitting using Co-Mo-P@NCNS-600 as both cathode and anode.

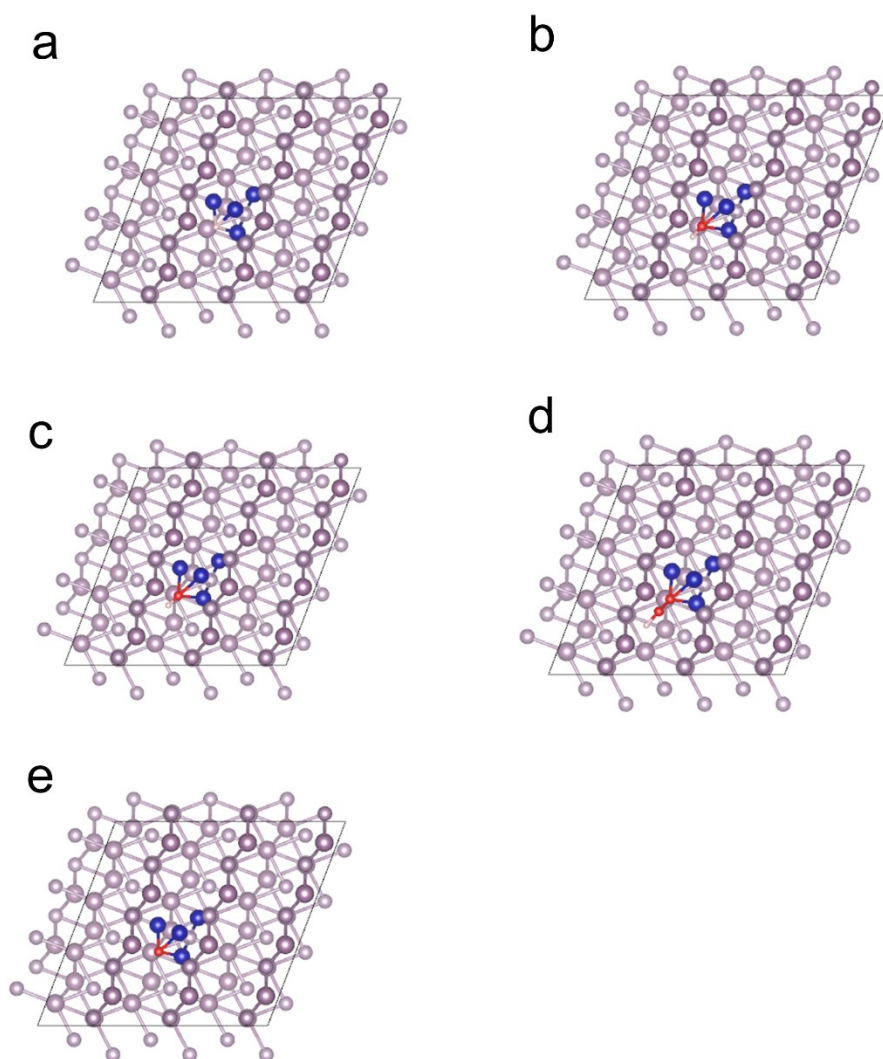

**Figure S15.** Simulation model of (a) Co-Mo-P@NCNS-600--H, (b) Co-Mo-P@NCNS-600 ---HandOH and (c) Co-Mo-P@NCNS-600 ---O;(d) Co-Mo-P@NCNS-600 ---OH, (e) MoO<sub>2</sub>—OH and (f) Co-Mo-P@NCNS-600—OOH.

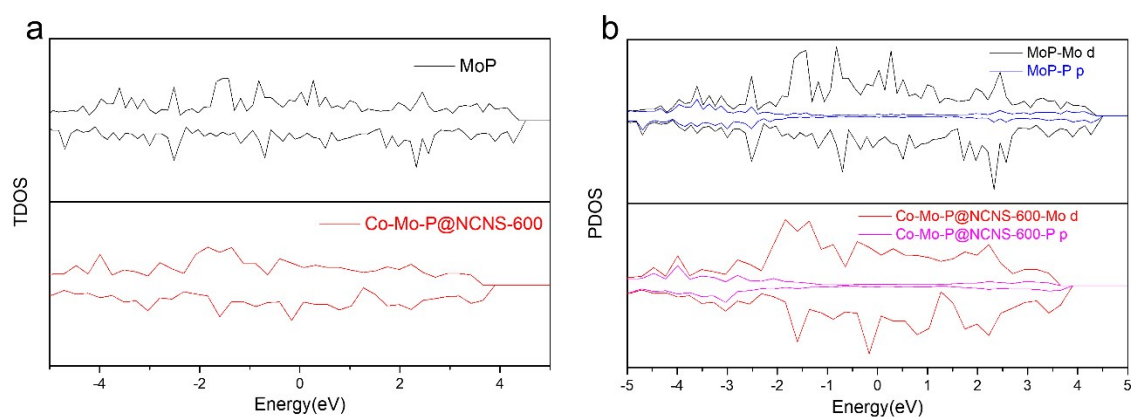

**Figure S16.** (a) TDOS and (b) PDOS of Co-Mo-P@NCNS-600 and pure MoP.

**Table S1.** Activities for HER of Co-Mo-P@NCNS-600 catalysts and other reported phosphide-based electrocatalysts

| Literature                                               | Catalyst                                               | Electrolyte | Substrate     | $\eta_{10}$<br>(mV vs. RHE) |
|----------------------------------------------------------|--------------------------------------------------------|-------------|---------------|-----------------------------|
| This work                                                | Co-Mo-P@NCNS-600                                       | 1 M KOH     | GCE           | 62                          |
| Applied Catalysis B: Environmental, 2019, 245, 528, 535. | CoP/MoP@NC                                             | 1 M KOH     | Carbon cloth  | 94                          |
| Energy Environ. Sci. 11 (2018) 872-880.                  | Ni-Co-P HNBs                                           | 1 M KOH     | Ni foam       | 107                         |
| Angew. Chem. Int. Ed. 58 (2019) 4923-4928                | Co/ $\beta$ -Mo <sub>2</sub> C@N-CNTs/GCE              | 1 M KOH     | GCE           | 170                         |
| Adv. Funct. Mater. 28 (2018) 1706847                     | NiFe LDH@NiCoP                                         | 1 M KOH     | Ni foam       | 120                         |
| Adv. Funct. Mater. 27 (2017) 1703455.                    | Co <sub>4</sub> Ni <sub>1</sub> P                      | 1 M KOH     | RDE           | 129                         |
| Adv. Energy Mater. 8 (2018) 1703290                      | O-Ni <sub>0.75</sub> Fe <sub>0.25</sub> P <sub>2</sub> | 1 M KOH     | Carbon fibers | 169                         |



|                                      |            |         |         |     |
|--------------------------------------|------------|---------|---------|-----|
| Nano Energy<br>39 (2017)<br>626-638. | 3D-CNTA/NF | 1 M KOH | Ni foam | 185 |
|--------------------------------------|------------|---------|---------|-----|

**Table S2.** Activities for OER of MoP/Co<sub>2</sub>P @NCNS -600 catalysts and other reported phosphide-based electrocatalysts

| Literature                                                                     | Catalyst                                               | Electrolyte | Substrate        | $\eta_{10}$<br>(mV vs. RHE) |
|--------------------------------------------------------------------------------|--------------------------------------------------------|-------------|------------------|-----------------------------|
| This work<br>Applied Catalysis<br>B: Environmental,<br>2019, 245, 528,<br>535. | Co-Mo-P@NCNS-600                                       | 1 M KOH     | GCE              | 270                         |
| Adv. Funct.<br>Mater. 27 (2017)<br>1703455.                                    | CoP/MoP@NC                                             | 1 M KOH     | Carbon cloth     | 270                         |
| Nano Lett. 16<br>(2016) 7718-7725.                                             | Co <sub>4</sub> Ni <sub>1</sub> P                      | 1 M KOH     | RDE              | 280                         |
| Nano Energy 39<br>(2017) 626-638.                                              | NiCoP                                                  | 1 M KOH     | Ni foam          | 280                         |
| Adv. Energy<br>Mater. 8 (2018)<br>1703290                                      | 3D-CNTA/NF                                             | 1 M KOH     | Ni foam          | 360                         |
| Angew. Chem.<br>Int. Ed. 129<br>(2017) 3955-3958.                              | O-Ni <sub>0.75</sub> Fe <sub>0.25</sub> P <sub>2</sub> | 1 M KOH     | Carbon<br>fibers | 320                         |
| Adv. Funct.<br>Mater. 28 (2018)<br>1801136.                                    | NiCoP/C                                                | 1 M KOH     | RDE              | 330                         |
| Nano Energy 48<br>(2018) 284-291.                                              | Co/NBC-900                                             | 1 M KOH     | GCE              | 302                         |
|                                                                                | NiCo <sub>2</sub> P <sub>2</sub> /GOD                  | 1 M KOH     | Ti               | 340                         |

**Table S3.** A survey of the performance of overall water splitting with various

electrocatalysts

| Literature                                                        | Catalyst                                 | Substrate       | Current<br>density (mA<br>cm <sup>-2</sup> ) | Cell voltage<br>(V) |
|-------------------------------------------------------------------|------------------------------------------|-----------------|----------------------------------------------|---------------------|
| This work                                                         | Co-Mo-P@NCNS-600                         | GCE             | 10                                           | 1.58                |
| Applied Catalysis<br>B: Environmental,<br>2019, 245, 528,<br>535. | CoP/MoP@NC                               | Carbon<br>cloth | 50                                           | 1.71                |
| Angew. Chem.<br>Int. Ed. 58 (2019)<br>4923-4928.                  | Co/ $\beta$ -Mo <sub>2</sub> C@N-CNTs    | GCE             | 10                                           | 1.64                |
| Nano Energy 39<br>(2017) 626-638.                                 | 3D-CNTA                                  | Ni foam         | 10                                           | 1.68                |
| Adv. Energy<br>Mater. 7 (2017)<br>1601555.                        | Cu <sub>0.3</sub> Co <sub>2.7</sub> P/NC | Ni foam         | 70                                           | 1.74                |
| Nano Energy 34<br>(2017) 472-480.                                 | Ni <sub>1.5</sub> Fe <sub>0.5</sub> P    | Carbon<br>fiber | 20                                           | 1.635               |
| Energy Environ.<br>Sci. 11 (2018)<br>872-880.                     | Ni-Co-P HNBS                             | Ni foam         | 10                                           | 1.62                |
| Applied Catalysis<br>B: Environmental,<br>271 (2020)<br>118939.   | Co@CNT                                   | Ni foam         | 10                                           | 1.58                |

**Table S4.** The correction of zero point energy and entropy of the adsorbed and

gaseous species.

|                  | ZPE(eV) | TS(eV) |
|------------------|---------|--------|
| *OOH             | 0.35    | 0      |
| *O               | 0.05    | 0      |
| *H               | 0.16    | 0.01   |
| *OH              | 0.31    | 0.01   |
| H <sub>2</sub> O | 0.56    | 0.67   |
| H <sub>2</sub>   | 0.27    | 0.41   |

[1] G. Kresse, J. Furthmüller, Efficient iterative schemes for ab initio total-energy calculations using a plane-wave basis set, *Physical Review B*, 54 (1996) 11169-11186

[2] G. Kresse, J. Hafner, Ab initio, *Physical Review B*, 49 (1994) 14251-14269

[3] P.E. Blöchl, Projector augmented-wave method, *Physical Review B*, 50 (1994) 17953-17979

[4] J.P. Perdew, K. Burke, M. Ernzerhof, Generalized Gradient Approximation Made Simple, *Physical Review Letters*, 77 (1996) 3865-3868

[5] Y. Zhang, W. Yang, Comment on "Generalized Gradient Approximation Made Simple", *Physical Review Letters*, 80 (1998) 890-890

[6] B. Hammer, L.B. Hansen, J.K. Nørskov, Improved adsorption energetics within density-functional theory using revised Perdew-Burke-Ernzerhof functionals, *Physical Review B*, 59 (1999) 7413-7421

[7] H.J. Monkhorst, J.D. Pack, Special points for Brillouin-zone integrations, *Physical review B*, 13 (1976) 5188

[8] J.K. Nørskov, J. Rossmeisl, A. Logadottir, L. Lindqvist, J.R. Kitchin, T. Bligaard,

H. Jonsson, Origin of the overpotential for oxygen reduction at a fuel-cell cathode,  
The Journal of Physical Chemistry B, 108 (2004) 17886-17892
